# Supplementary material for: Bedaquiline micro-heteroresistance after tuberculosis treatment cessation
Source: PubMed Central journal article supplement (PMC6518951; doi:10.1056/nejmc1815121), 2019-05-30

| 1  | <b>Content</b>                | <b>Page</b> |
|----|-------------------------------|-------------|
| 2  | Methods: .....                | 2           |
| 3  | Results and Discussion: ..... | 3           |
| 4  | Acknowledgements: .....       | 5           |
| 5  | Disclaimer: .....             | 6           |
| 6  | References: .....             | 6           |
| 7  | Supplementary tables: .....   | 8           |
| 8  | Table S1: .....               | 8           |
| 9  | Table S2: .....               | 9           |
| 10 | Table S3: .....               | 10          |
| 11 | Supplementary figures: .....  | 11          |
| 12 | Figure S1: .....              | 12          |
| 13 |                               |             |

## 14 SUPPLEMENTAL APPENDIX:

15

### 16 **Methods:**

#### 17 *Whole genome sequencing (WGS) of serial patient isolates*

18 Stored clinical isolates spanning most of the course of treatment and several months after cessation of  
19 treatment were re-cultured and DNA was extracted as previously described.<sup>1</sup> Eight isolates were  
20 available for WGS using the Illumina NextSeq platform at a median coverage of 62x. Sequencing reads  
21 were mapped to a reference genome (*Mycobacterium tuberculosis*, H37Rv, Genbank: AL123456) with  
22 variant calling and annotation performed as previously described.<sup>2</sup> All identified variants were visually  
23 inspected using Tablet<sup>3</sup>. In addition, TB profiler<sup>4</sup> was used to ascertain the genotypic drug susceptibility  
24 (DST) profile. Raw sequencing reads have been deposited at the European Nucleotide Archive (project  
25 accession nr: PRJEB32109). All variants identified in *Rv0678* were confirmed by Sanger sequencing  
26 using the following primer pair (forward primer: 5'agagttccaatcatcgccct 3'; reverse primer:  
27 5'tgctcatcagtcgtcctctc 3').

#### 28 *Targeted deep sequencing and data analysis*

29 Targeted deep sequencing was done as previously described<sup>5</sup> using the following primer pair; forward  
30 primer: 5'ACCCAAGTGAATGGAGCGAACTTGTGAGCGTCAACGAC G 3'; reverse primer: 5'  
31 ACGCACTTGACTTGTCTTCGGTTGCTCATCAGTCGTCCT 3'. Raw sequencing reads have been  
32 deposited at Bioproject at NCBI (project accession nr: PRJNA531707). Data analysis was done using  
33 the Allele-specific alignment pipeline (ASAP)<sup>5</sup> using two aligners, Bowtie<sup>6</sup> and BWA<sup>7</sup>. Only short  
34 insertions and deletions identified in both alignment files generated by BWA and Bowtie were included  
35 for further analysis.

#### 36 *Bedaquiline phenotypic drug susceptibility testing*

37 Phenotypic DST for bedaquiline was conducted using the BACTEC MGIT 960 system and EpiCentre  
38 software equipped with the TB eXist module for DST.<sup>8</sup> Briefly, each *M. tuberculosis* isolates was  
39 subcultured in MGIT supplemented with Oleic Albumin Dextrose Catalase (OADC) until a positive  
40 growth was observed. Thereafter 0.5 mL of each subculture was added to respective MGIT tubes  
41 supplemented with 0.8 mL of OADC and containing a final bedaquiline concentration of 1µg/ml.  
42 Concurrently, a growth control was prepared by inoculating 0.5 mL of a 1:100 dilution of each  
43 subculture into respective MGIT tubes supplemented with 0.8 mL of OADC without bedaquiline. The  
44 laboratory strain, H37Rv (ATCC 27294), was used as a susceptible control and the *M. tuberculosis*  
45 strain (BCCM/ITM 121749), obtained from Belgium co-ordinated collection of micro-organisms (A63P  
46 mutation in *atpE*) was used as a resistant control. Isolates were considered resistant if the growth index  
47 of the bedaquiline containing tube was greater than 100 when the growth control reached a growth index  
48 of 400.

49 **Results and discussion:**

50 A 65-year old male was diagnosed in 2013 in South Africa with MDR-TB using Xpert MTB/RIF and  
51 Genotype MTBDR*plus*. Baseline chest x-ray showed right hilar infiltrate, consolidation in the right apex  
52 and cavitation in the left apex. He initiated a standardised regimen including moxifloxacin,  
53 pyrazinamide, kanamycin, ethionamide, isoniazid and terizidone, as per national guidelines within two  
54 days of diagnosis. Isolates taken at diagnosis and initiation of treatment were culture-positive and  
55 susceptible to ofloxacin and amikacin based on routine phenotypic DST (National Health Laboratory  
56 Services, Green Point, South Africa). Isoniazid was withdrawn 28 days after treatment initiation.  
57 Follow-up routine sputum specimens taken 42 days and 3.4 months after treatment initiation were acid-  
58 fast bacilli (AFB) smear and culture negative (Table S1). Four subsequent sputum specimens collected  
59 four to eight months after treatment initiation were smear- and culture-positive. Kanamycin was stopped  
60 six months after treatment initiation. The sputum specimen taken six months after initiation of standard  
61 treatment showed phenotypic resistance to ofloxacin using phenotypic DST and the patient was  
62 classified as failure of treatment. Month six chest x-ray showed extensive fibrosis in the left lung and  
63 cavitation in both apices. At month eight, treatment was revised to include high-dose isoniazid (800  
64 mg), ethambutol, pyrazinamide, terizidone, linezolid, para-aminosalicylic acid (PAS) and kanamycin.  
65 Bedaquiline was added 22 days later and administered for six months per the South African Bedaquiline  
66 Clinical Access Program.<sup>9</sup> The patient was admitted at a TB inpatient facility for the first two months  
67 of bedaquiline treatment. By examination of the patient's treatment card and patient interview,  
68 adherence to bedaquiline during both in-patient and out-patient treatment was subjectively assessed as  
69 good, although strict direct observation of treatment was not practised. Pyrazinamide and ethambutol  
70 were stopped at 2.3 months following revised regimen initiation due to persistent arthralgia and changes  
71 in vision. The patient refused kanamycin at month six for a duration of 2.4 months after more than  
72 twelve months of injectable treatment. Kanamycin and high-dose isoniazid were stopped at 13 months  
73 (isoniazid due to vision problems). The physician decided to stop all treatment at 15.7 months after  
74 which the patient was transitioned to palliative care and died seven months later. All sputum cultures  
75 subsequent to stopping of all treatment were positive.

76  
77 During the course of treatment a total of 19 sputum cultures were requested (Table S1), of which ten  
78 could be retrieved from the National Health Laboratory Service (NHLS) in Cape Town. From the ten  
79 isolates retrieved, eight were re-cultured for next generation sequencing (NGS), while two isolates lost  
80 viability. All eight isolates differed by a maximum of five variants, implying *in vivo* evolution rather  
81 than reinfection with different strains. WGS of the first available isolate (isolate A) taken 4.7 months  
82 after initiation of the standard MDR-TB treatment regimen showed that the patient was infected with a  
83 Beijing strain which harboured mutations in *rpoB* (S450L), *inhA* promoter region (-15 C/T), *embB*  
84 (M306V), *ethA* (65 T insertion), *ethR* (A95T), *gyrA* (D94G), *pncA* (467 GCACCC deletion) and *rrs*  
85 (514A/C) associated with resistance to rifampicin, isoniazid, ethambutol, ethionamide,  
86 fluoroquinolones, pyrazinamide and streptomycin, respectively. All of these resistance-causing

87 mutations were present in 100% of the sequencing reads. The detection of a D94G substitution in *gyrA*,  
88 which confers resistance to fluoroquinolones, suggests that the classification of fluoroquinolone  
89 susceptibility by phenotypic DST performed at the routine laboratory on the same isolate was incorrect.  
90 The isolate taken 7.2 months after treatment initiation (isolate B) did not show amplification of  
91 resistance, but showed the loss of a variant in *rpoC* (A734G) (Table S2, Figure S1). According to the  
92 WGS data, the patient received only two potentially effective drugs (kanamycin and terizidone) (Figure  
93 1). Phenotypic resistance to ofloxacin was first detected by the routine laboratory on the specimen  
94 collected 6 months after treatment initiation. Targeted deep sequencing (TDS) of isolate B did not detect  
95 any underlying variants in *Rv0678*, the gene associated with resistance to bedaquiline.<sup>10</sup>

96

97 WGS analysis of isolate C collected 2 months after initiation of the individualized pre-XDR treatment  
98 regimen and 10 weeks after the initiation of bedaquiline, showed the presence of wild-type sequences  
99 for the genes associated with resistance to second-line injectables (*rrs* (1401 region), PAS (*thyA*, *folC*,  
100 *dfrA*, *ribD*), linezolid (*rrl*, *rplC*), terizidone (*ddl*, *cycA*, *alr*, *ald*) and bedaquiline (*Rv0678*) suggesting  
101 that the patient likely received five effective anti-TB drugs (high dose isoniazid, kanamycin, linezolid,  
102 terizidone and PAS) at the time of addition of bedaquiline. TDS however showed the presence of micro-  
103 heteroresistance against bedaquiline with a C insertion at position 192 in *Rv0678* in 0.05% of the reads  
104 (Table S3) despite phenotypic susceptibility to bedaquiline and genotypic susceptibility on WGS. In the  
105 isolate collected one week after bedaquiline treatment was stopped (isolate D), WGS and TDS showed  
106 that the *Rv0678* 192 variant was fixed and TDS showed the presence of multiple low frequency (>0.1%)  
107 indels (insertions and deletions) in codons 194 to 198 in *Rv0678*. In addition, a fixed variant in *Rv2839c*  
108 (S347P) was also observed by WGS (Table S2). Isolate D was also phenotypically resistant to  
109 bedaquiline. Subsequently, the 192 C insertion decreased to 0.1% of reads in isolate F (taken 12.3  
110 months after the start of the individualized regimen and five months after the cessation of bedaquiline)  
111 and was replaced with a different *Rv0678* variant (GA insertion at gene position 138) and a second *rpoB*  
112 variant (S582A) according to WGS. In the subsequent isolates taken 15.7 months (isolate G) and 21.7  
113 months (isolate H) after initiation of the revised regimen, WGS and TDS showed the systematic decrease  
114 of the *Rv0678* 138 GA insertion over time and the gain of a third *Rv0678* variant (G insertion at position  
115 138). WGS showed the emergence of an *rpoC* (V483G) variant in this isolate. These *Rv0678* 138 G  
116 insertion and *rpoC* V483G were found with a variant frequency of 96% in the last isolate taken. The  
117 systematic gain and loss of *Rv0678* variants identified by WGS was confirmed by Sanger sequencing  
118 (data not shown). All isolates with a variant frequency of >1% in *Rv0678* were resistant to bedaquiline  
119 at a concentration of 1 µg/ml in MGIT media.

120 The identification of a subpopulation of bacilli harbouring a variant in *Rv0678* 10 weeks after addition  
121 of bedaquiline suggest that bedaquiline resistance emerged soon after its inclusion in the revised MDR-  
122 TB regimen and was subsequently selected as treatment continued. Following the withdrawal of  
123 bedaquiline a further gain and loss of *Rv0678* variants were observed over the course of the long half-

124 life of bedaquiline (5.5 months)<sup>11</sup>. These results suggest that new *Rv0678* variants can emerge while  
125 plasma concentration of bedaquiline are decreasing. Alternatively, the variants could have emerged in  
126 different lesions prior to the withdrawal of bedaquiline and subsequently observed as these lesions  
127 ruptured into the airways. Our data also suggests that bedaquiline resistance in this patient developed  
128 despite treatment with a background regimen containing five anti-TB drugs that were likely effective  
129 based on susceptibility. This highlights our lack of comprehensive understanding of resistance  
130 emergence during treatment. No amplification of mutations conferring resistance to the five companion  
131 drugs were identified in the serial patient isolates, suggesting that the isolates would still be susceptible  
132 to those drugs (high dose isoniazid, kanamycin, linezolid, terizidone and PAS). The presence of  
133 bedaquiline-resistant *M. tuberculosis* following cessation of bedaquiline and cessation of all TB  
134 treatment because of treatment failure poses a potential transmission risk and threatens the longevity of  
135 this new drug. Monitoring of pre-existing and emerging bedaquiline resistance should be a priority  
136 among patients with delayed sputum culture conversion and those with positive sputum cultures post  
137 bedaquiline cessation.

138 Four of the nine variable loci were in *rpoB* and *rpoC* genes, associated with rifampicin resistance or  
139 fitness compensatory mechanisms. Secondary *rpoB* mutations have been shown to improve growth  
140 characteristics and fitness rates in a BCG model<sup>12</sup>. Numerous studies have investigated the role of *rpoC*  
141 mutations in compensating for the loss of fitness due to *rpoB* mutations<sup>13-16</sup>. Three of the four variants  
142 were however transient and only one variant (V483G) was fixed in the last available isolate. We have  
143 reported the V483G substitution to be the most frequent *rpoC* variant in our setting, which is also  
144 associated with transmission clusters as defined by IS6110 fingerprinting<sup>14</sup>.

145  
146 In summary, this case demonstrates the rapid acquisition of bedaquiline resistance in the presence of  
147 five likely effective drugs. There was no evidence of poor adherence to treatment over this time. The  
148 emergence of *Rv0678* variants, after completion of six months bedaquiline, demonstrates the risk of  
149 resistance amplification after cessation of a drug with a long half-life (5.5 months for bedaquiline)<sup>11</sup>.  
150 These data highlight the potential utility of sequencing approaches to guide treatment and monitor  
151 resistance emergence and the need to incorporate new drugs into more effective regimens from the start  
152 of treatment.

## 153 154 **Acknowledgements**

155 This work is supported by the National Research Foundation, the South African Medical Research  
156 Council (SA MRC) and the Stellenbosch University Faculty of Medicine Health Sciences. The content  
157 is solely the responsibility of the authors and does not necessarily represent the official views of the SA  
158 MRC. The work is supported by National Institutes of Health (NIH) grant R01AI131939 (DM  
159 Engelthaler and JZ Metcalfe). The content is solely the responsibility of the authors and does not  
160 necessarily represent the official views of the NIH. HC acknowledges support from a Wellcome Trust  
161 fellowship (ref 099818/Z/12/Z). MdV, AvR and SL are supported by TORCH funding through the

162 Flemish Fund for Scientific Research (FWO G0F8316N). SL has also been supported by the Swiss  
163 National Science Foundation (P2BSP3\_165379). The sequencing work was performed at the  
164 Translational Genomics Research Institute and supported by the Bill & Melinda Gates Foundation Grant  
165 OPP1115887 (M Schito) for the ReSeqTB sequencing platform. GT acknowledges support from the  
166 EDCTP2 programme supported by the European Union (grant number SF1401 – OPTIMAL  
167 DIAGNOSIS).

168

#### 169 **Disclaimer**

170 Use of trade names is for identification only and does not constitute endorsement by the U.S.  
171 Department of Health and Human Services, the U.S. Public Health Service, or the Centers for Disease  
172 Control and Prevention. The findings and conclusions in this report are those of the authors and do not  
173 necessarily represent the views of the Centers for Disease Control and Prevention.

174

#### 175 **References:**

- 176 1. Warren R, de Kock M, Engelke E, et al. Safe Mycobacterium tuberculosis DNA extraction  
177 method that does not compromise integrity. *Journal of clinical microbiology* 2006;44:254-6.
- 178 2. Black PA, de Vos M, Louw GE, et al. Whole genome sequencing reveals genomic heterogeneity  
179 and antibiotic purification in Mycobacterium tuberculosis isolates. *BMC genomics* 2015;16:857.
- 180 3. Milne I, Bayer M, Cardle L, et al. Tablet--next generation sequence assembly visualization.  
181 *Bioinformatics* 2010;26:401-2.
- 182 4. Coll F, McNerney R, Preston MD, et al. Rapid determination of anti-tuberculosis drug resistance  
183 from whole-genome sequences. *Genome Med* 2015;7:51.
- 184 5. Colman RE, Anderson J, Lemmer D, et al. Rapid Drug Susceptibility Testing of Drug-Resistant  
185 Mycobacterium tuberculosis Isolates Directly from Clinical Samples by Use of Amplicon Sequencing:  
186 a Proof-of-Concept Study. *Journal of clinical microbiology* 2016;54:2058-67.
- 187 6. Langmead B. Aligning short sequencing reads with Bowtie. *Curr Protoc Bioinformatics*  
188 2010;Chapter 11:Unit 11 7.
- 189 7. Li H, Durbin R. Fast and accurate short read alignment with Burrows-Wheeler transform.  
190 *Bioinformatics* 2009;25:1754-60.
- 191 8. Springer B, Lucke K, Calligaris-Maibach R, Ritter C, Bottger EC. Quantitative drug  
192 susceptibility testing of Mycobacterium tuberculosis by use of MGIT 960 and EpiCenter  
193 instrumentation. *Journal of clinical microbiology* 2009;47:1773-80.
- 194 9. Conradie F, Meintjes G, Hughes J, et al. Clinical access to Bedaquiline Programme for the  
195 treatment of drug-resistant tuberculosis. *S Afr Med J* 2014;104:164-6.
- 196 10. Andries K, Villellas C, Coeck N, et al. Acquired resistance of Mycobacterium tuberculosis to  
197 bedaquiline. *PloS one* 2014;9:e102135.

- 198 11. McLeay SC, Vis P, van Heeswijk RP, Green B. Population pharmacokinetics of bedaquiline  
199 (TMC207), a novel antituberculosis drug. *Antimicrobial agents and chemotherapy* 2014;58:5315-24.
- 200 12. Meftahi N, Namouchi A, Mhenni B, Brandis G, Hughes D, Mardassi H. Evidence for the critical  
201 role of a secondary site rpoB mutation in the compensatory evolution and successful transmission of an  
202 MDR tuberculosis outbreak strain. *J Antimicrob Chemother* 2016;71:324-32.
- 203 13. Comas I, Borrell S, Roetzer A, et al. Whole-genome sequencing of rifampicin-resistant  
204 *Mycobacterium tuberculosis* strains identifies compensatory mutations in RNA polymerase genes.  
205 *Nature genetics* 2012;44:106-10.
- 206 14. de Vos M, Muller B, Borrell S, et al. Putative compensatory mutations in the rpoC gene of  
207 rifampin-resistant *Mycobacterium tuberculosis* are associated with ongoing transmission. *Antimicrobial*  
208 *agents and chemotherapy* 2013;57:827-32.
- 209 15. Brandis G, Hughes D. Genetic characterization of compensatory evolution in strains carrying  
210 rpoB Ser531Leu, the rifampicin resistance mutation most frequently found in clinical isolates. *J*  
211 *Antimicrob Chemother* 2013;68:2493-7.
- 212 16. Brandis G, Wrande M, Liljas L, Hughes D. Fitness-compensatory mutations in rifampicin-  
213 resistant RNA polymerase. *Mol Microbiol* 2012;85:142-51.

214

215

216

217 **Supplementary tables**218 **Table S1: *M. tuberculosis* isolates collected over the course of treatment**

| Isolate taken                                       | Smear microscopy | Culture | GenoType MTBDR <sub>plus</sub> |           | Phenotypic DST |           | WGS isolate label |          |
|-----------------------------------------------------|------------------|---------|--------------------------------|-----------|----------------|-----------|-------------------|----------|
|                                                     |                  |         | Rifampicin                     | Isoniazid | Amikacin       | Ofloxacin |                   |          |
| <b>Time after initiation of treatment</b>           | 0 days*          | Neg     | Pos                            | R         | R              | S         | S                 |          |
|                                                     | 2 days           | 2+      | Pos                            | R         | R              | S         | S                 |          |
|                                                     | 41 days          | Neg     | Neg                            |           |                |           |                   |          |
|                                                     | 3.4 months       | Neg     | Neg                            |           |                |           |                   |          |
|                                                     | 4.7 months       | Scanty  | Pos                            | R         | R              | S         | S                 | <b>A</b> |
|                                                     | 6.2 months       | 3+      | Pos                            | R         | R              | S         | R                 |          |
|                                                     | 7.2 months       | Scanty  | Pos                            | R         | R              | S         | S                 | <b>B</b> |
|                                                     | 8 months         | 3+      | Pos                            | R         | R              | S         | R                 |          |
| <b>Time after initiation of revised MDR regimen</b> | 20 days          | 3+      | Pos                            | R         | R              | S         | S                 |          |
|                                                     | 22 days          | 3+      | Pos                            | R         | R              | S         | S                 |          |
|                                                     | 2 months         | Scanty  | Pos                            | R         | R              | S         | S                 | <b>C</b> |
|                                                     | 3.5 months       | Neg     | Neg                            |           |                |           |                   |          |
|                                                     | 5.6 months       | Neg     | Pos                            | ND        | ND             |           |                   |          |
|                                                     | 7.2 months       | Neg     | Pos                            | R         | R              | S         | S                 | <b>D</b> |
|                                                     | 9.7 months       | Scanty  | Pos                            | R         | R              | S         | R                 | <b>E</b> |
|                                                     | 10.3 months      | Neg     | NTM                            |           |                |           |                   |          |
|                                                     | 12.3 months      | Neg     | Pos                            | R         | R              | S         | R                 | <b>F</b> |
|                                                     | 15.7 months      | Neg     | Pos                            | R         | R              | S         | R                 | <b>G</b> |
| 21.7 months                                         | 3+               | Pos     | R                              | R         | S              | R         | <b>H</b>          |          |

Definitions for abbreviations: Tx = treatment; MTB = *M. tuberculosis*; WGS = whole genome sequencing; Pos = positive; Neg = negative; R = resistant; S = sensitive; ND = not done; NTM = non-tuberculosis mycobacteria

\* Xpert MTB/RIF MTB complex positive and rifampicin resistant



**Table S2: Variants identified through whole genome sequencing in serial isolates cultured from the patient during treatment.**

| Isolate  | Time relative to the initiation of the revised regimen | Variant frequency of variants identified by whole genome sequencing* |                      |                            |                         |                      |                             |                            |                      |                          |
|----------|--------------------------------------------------------|----------------------------------------------------------------------|----------------------|----------------------------|-------------------------|----------------------|-----------------------------|----------------------------|----------------------|--------------------------|
|          |                                                        | <i>rpoC</i><br>A734G                                                 | <i>rpoC</i><br>L823M | <i>Rv0678</i><br>192 G ins | <i>Rv2839c</i><br>S347P | <i>rpoB</i><br>S582A | <i>Rv0678</i><br>138 GA ins | <i>Rv0678</i><br>138 G ins | <i>rpoC</i><br>V483G | <i>Rv3777</i><br>147 Syn |
| <b>A</b> | <b>-102 days</b>                                       | 86<br>(14/85)                                                        | 0                    | 0                          | 0                       | 0                    | 0                           | 0                          | 0                    | 0                        |
| <b>B</b> | <b>-29 days</b>                                        | 0                                                                    | 0                    | 0                          | 0                       | 0                    | 0                           | 0                          | 0                    | 0                        |
| <b>C</b> | <b>62 days</b>                                         | 0                                                                    | 100<br>(36/36)       | 0                          | 0                       | 0                    | 0                           | 0                          | 0                    | 0                        |
| <b>D</b> | <b>7.2 months</b>                                      | 0                                                                    | 0                    | 100 (56/56)                | 100 (56/56)             | 0                    | 0                           | 0                          | 0                    | 0                        |
| <b>E</b> | <b>9.7 months</b>                                      | 0                                                                    | 0                    | 100 (56/56)                | 100 (56/56)             | 0                    | 0                           | 0                          | 0                    | 0                        |
| <b>F</b> | <b>12.3 months</b>                                     | 0                                                                    | 0                    | 0                          | 0                       | 100 (81/81)          | 100 (75/75)                 | 0                          | 0                    | 0                        |
| <b>G</b> | <b>15.7 months</b>                                     | 0                                                                    | 0                    | 0                          | 0                       | 35 (24/67)           | 25 (18/71)                  | 63 (45/71)                 | 65 (52/79)           | 52 (36/68)               |
| <b>H</b> | <b>21.7 months</b>                                     | 0                                                                    | 0                    | 0                          | 0                       | 0                    | 0                           | 96 (79/82)                 | 95 (65/68)           | 91 (73/80)               |

\* In brackets - Number of reads with variant/total number of reads

**Table S3: Minority populations identified through targeted deep sequencing of Rv0678**

| Isolate               | Date#              | 138 G insertion |                        | 138 GA insertion |                        | 139 T insertion |                    | 192 G insertion |                        | 193 G deletion     |      |
|-----------------------|--------------------|-----------------|------------------------|------------------|------------------------|-----------------|--------------------|-----------------|------------------------|--------------------|------|
|                       |                    | WGS*            | TDS*                   | WGS*             | TDS*                   | WGS*            | TDS*               | WGS*            | TDS*                   | WGS*               | TDS* |
| <b>A</b>              | <b>-102 days</b>   | 0               | -                      | 0                | -                      | 0               | -                  | 0               | -                      | 0                  | -    |
| <b>B</b>              | <b>-29 days</b>    | 0               | 0                      | 0                | 0                      | 0               | 0                  | 0               | 0                      | 0                  | 0    |
| <b>C</b>              | <b>62 days</b>     | 0               | 0                      | 0                | 0                      | 0               | 0                  | 0               | 0.05<br>(7/15886)      | 0                  | 0    |
| <b>D<sup>\$</sup></b> | <b>7.2 months</b>  | 0               | 0                      | 0                | 0                      | 0               | 0                  | 100<br>(56/56)  | 96.66<br>(17551/18158) | 0                  | 0    |
| <b>E</b>              | <b>9.7 months</b>  | 0               | -                      | 0                | -                      | 0               | -                  | 100<br>(56/56)  | -                      | 0                  | -    |
| <b>F</b>              | <b>12.3 months</b> | 0               | 0                      | 100<br>(75/75)   | 97.52<br>(13299/13638) | 0               | 0                  | 0               | 0.1<br>(13/13638)      | 0.37<br>(50/13638) | 0    |
| <b>G</b>              | <b>15.7 months</b> | 63<br>(45/71)   | 65.48<br>(9317/14230)  | 25<br>(18/71)    | 28.35<br>(4034/14230)  | 0               | 0                  | 0               | 3.22<br>(461/14230)    | 0.28<br>(39/14230) | 0    |
| <b>H</b>              | <b>21.7 months</b> | 96<br>(79/82)   | 91.68<br>(13029/14212) | 0                | 5.86<br>(832/14212)    | 0               | 0.14<br>(19/14212) | 0               | 0.03<br>(4/14212)      | 0                  | 0    |

Definitions of abbreviations: ins = insertion; WGS = whole genome sequencing; TDS = targeted deep sequencing; "-" = not done

# relative to initiation of revised MDR-TB regimen

\* In brackets - Number of reads with variant/total number of reads

\$ other low frequency variants identified in isolate D: 194 T insertion (0.32%), 195 C insertion (0.22%); 196 T insertion (0.22%), 197 T insertion (0.18%), 198 T insertion (0.17%)

## Supplementary figures

### Legend to Figure S1: Chronology of the diagnosis and treatment of the case

Summary of treatment provision, genotypic drug resistance (based on whole genome sequencing, WGS), phenotypic bedaquiline drug susceptibility testing (DST, MGIT), targeted deep sequencing and treatment monitoring during standardised treatment and a subsequent individualised bedaquiline-containing regimen. Overall, eight isolates (A-H) collected 4.7 months after initiation of standard treatment regimen until 6 months after all TB treatment was stopped underwent WGS, targeted deep sequencing of *Rv0678* and phenotypic bedaquiline DST. The patient was initially diagnosed with MDR-TB with low-level isoniazid resistance using Genotype MTBDR*plus*, and treated with a standardised MDR-TB treatment regimen but remained culture positive. Phenotypic As per guidelines, subsequent isolates were phenotypically characterized for ofloxacin and amikacin susceptibility. Ofloxacin resistance was first noted 6 months after treatment initiation. All isolates remained susceptible to second-line injectables. At 8.1 months a revised regimen was initiated with the subsequent addition of bedaquiline (22 days after initiation of revised regimen) and withdrawal of pyrazinamide and ethambutol (2 months after initiation of revised regimen). Bedaquiline was administered for 6 months. The patient refused kanamycin at month 6 of the revised regimen for a duration of 2.4 months. The individualized regimen was continued until the outcome of treatment failure at 15 months. Phenotypic DST showed that all isolates with a variant frequency of >1% in *Rv0678* were resistant to bedaquiline at 1µg/ml in MGIT.

Abbreviations: MDR-TB=multi-drug resistant tuberculosis; INH=isoniazid; Z=pyrazinamide; KAN=kanamycin; MXF=moxifloxacin; ETH=ethionamide; TZD=terizidone; hdIND=high dose isoniazid; KAN=kanamycin; LZD=linezolid; E=ethambutol; PAS=para-aminosalicylic acid; BDQ=bedaquiline; WGS=whole genome sequencing; DST=drug susceptibility testing; ins=insertion; R=resistant; S=susceptible

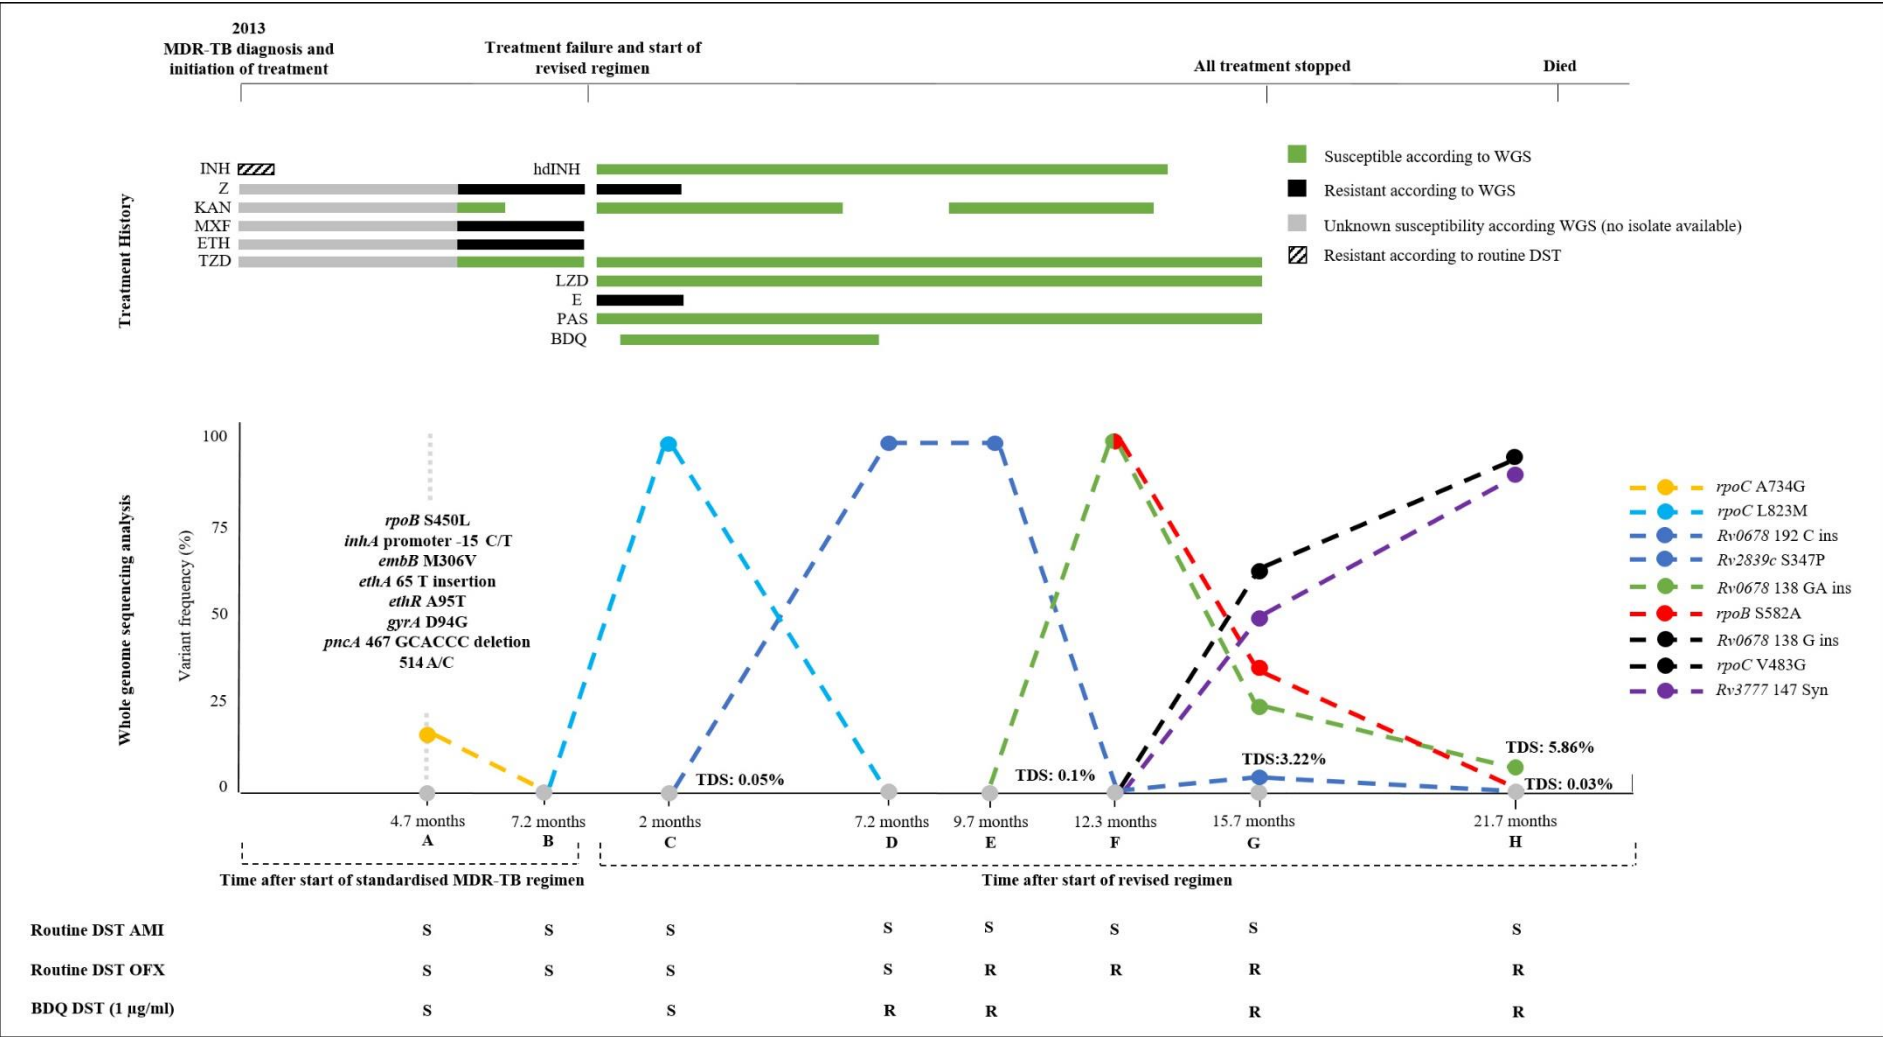

Supplement: NEJM-2019-1815121-s1.pdf [file NEJM-2019-1815121-s1.pdf]
